# Supplementary material
Source: PubMed Central journal article supplement (PMC3501118)
Supplement: Supp_Fig1.pdf [file Supp_Fig1.pdf]

**SUPPLEMENTARY FIG. S1.** Native macaque lungs are efficiently inflation-fixed by gravity instillation of formalin. **(A)** Cadaveric lungs (pictured collapsed, *ex vivo*) from rhesus macaques undergoing euthanasia were inflation-fixed with 10% neutral-buffered formalin for use as native lung controls. **(B, C)** For inflation fixation, the lungs are connected to an apparatus that provides constant inflation pressure. Formalin flowed from the reservoir through a series of valves that maintained the flow rate into an intermediate reservoir that set up a pressure head of  $\sim 25\text{--}30\text{ cm H}_2\text{O}$ . The height of the pressure head was maintained while the volume of the reservoir diminished, and flow stopped naturally as the lungs reach full inflation. **(D)** Fixed native lungs were stored inflated with and submerged in formalin until use.
