# Supplementary material
Source: PubMed Central journal article supplement (PMC3501118)
Supplement: Supp_Fig2.pdf [file Supp_Fig2.pdf]

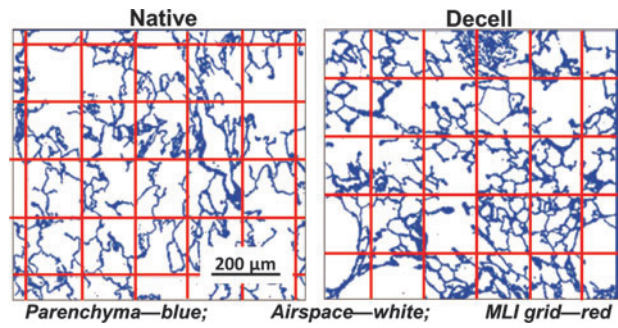

**SUPPLEMENTARY FIG. S2.** Calculating percent parenchyma and mean linear intercept (MLI) is accomplished by ImageJ analysis. Native and decellularized lungs were analyzed quantitatively for percent field area of parenchymal structures (blue) versus airspace (white) as well as MLI as determined by random gridline overlay (red). Images show representative fields used for analysis.
