# Supplementary material
Source: PubMed Central journal article supplement (PMC3501118)
Supplement: Supp_Fig3.pdf [file Supp_Fig3.pdf]

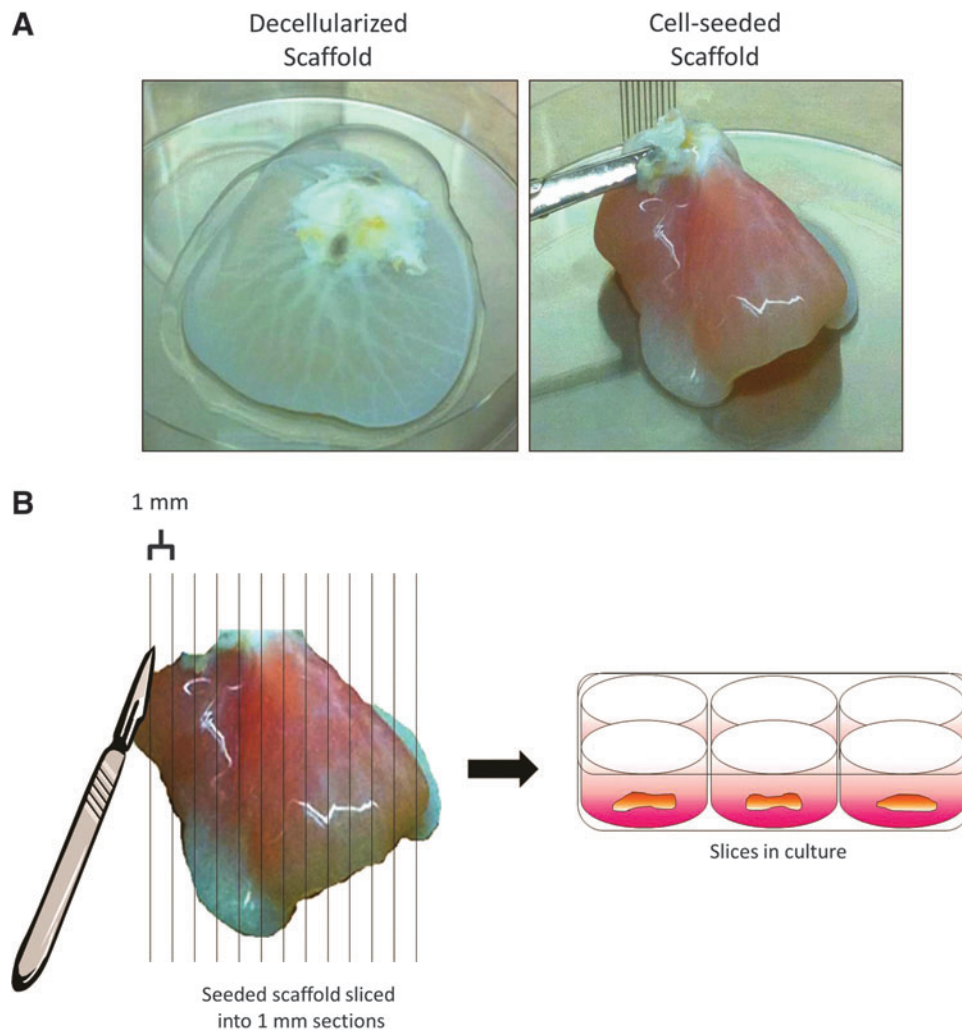

**SUPPLEMENTARY FIG. S3.** The slice culture technique is an effective way to seed and subsequently culture decellularized macaque lung tissue with stem cells. **(A)** Single lobes of decellularized rhesus lung scaffolds were seeded with stem cells suspended in a mix of complete culture medium with low melting-point agarose at 37°C. The seeded lobe was placed into ice-cold PBS and incubated at 4°C for no longer than 15 min. **(B)** Once solidified, the stem cell-seeded scaffold was sliced into 1-mm-thick slices using a sterile scalpel, and slices were cultured in individual wells of six-well plates with ~2 mL of complete culture medium at 37°C, 5% CO<sub>2</sub>. Medium was changed and slices are inverted daily.
