# Supplementary material
Source: PubMed Central journal article supplement (PMC3501118)
Supplement: Supp_Table1.pdf [file Supp_Table1.pdf]

SUPPLEMENTARY TABLE S1. (A) *p*-VALUES FOR COMPARISONS OF BONE MARROW-DERIVED MESENCHYMAL STEM CELL- VERSUS ADIPOSE-DERIVED MESENCHYMAL STEM CELL-EXTRACELLULAR MATRIX BINDING IN EXTRACELLULAR MATRIX ARRAY (BONFERRONI ADJUSTED  $\alpha=0.00625$ ). *p*-VALUES COMPARING THE BINDING OF (B) BONE MARROW-DERIVED MESENCHYMAL STEM CELLS AND (C) ADIPOSE-DERIVED MESENCHYMAL STEM CELLS ON SPECIFIC EXTRACELLULAR MATRIX PROTEINS (BONFERRONI ADJUSTED  $\alpha=0.0018$ ).

**A**

| BMSC vs. ASC ( <i>p</i> -values) |         |                                    |
|----------------------------------|---------|------------------------------------|
| ECM Protein                      | ANOVA   | Post-hoc<br>( $\alpha = 0.00625$ ) |
| Collagen I                       | <0.0001 | 0.1165                             |
| Collagen II                      |         | 0.0243                             |
| Collagen IV                      |         | 0.0229                             |
| Fibronectin                      |         | 0.0077                             |
| Laminin                          |         | 0.0970                             |
| Tenascin                         |         | 0.6992                             |
| Vitronectin                      |         | 0.2074                             |
| BSA                              |         | 0.4191                             |

**B**

**Post-hoc *p*-values ( $\alpha = 0.0018$ ) for BMSC binding between ECM groups**

[ANOVA (all groups):  $p < 0.0001$  including BSA control,  $p = 0.0007$  excluding control]

|             | Collagen I    | Collagen II       | Collagen IV       | Fibronectin       | Laminin           | Tenascin      | Vitronectin       | BSA               |
|-------------|---------------|-------------------|-------------------|-------------------|-------------------|---------------|-------------------|-------------------|
| Collagen I  | —             | 0.2860            | 0.5367            | 0.6663            | 0.0362            | 0.0406        | 0.0068            | <b>0.0001</b>     |
| Collagen II | 0.2860        | —                 | 0.6137            | 0.4968            | 0.0243            | 0.0443        | <b>0.0004</b>     | <b>&lt;0.0001</b> |
| Collagen IV | 0.5367        | 0.6137            | —                 | 0.8473            | 0.0445            | 0.0537        | 0.0048            | <b>&lt;0.0001</b> |
| Fibronectin | 0.6663        | 0.4968            | 0.8473            | —                 | 0.0448            | 0.0517        | 0.0061            | <b>&lt;0.0001</b> |
| Laminin     | 0.0362        | 0.0243            | 0.0445            | 0.0448            | —                 | 0.7375        | 0.0472            | <b>&lt;0.0001</b> |
| Tenascin    | 0.0406        | 0.0443            | 0.0537            | 0.0517            | 0.7375            | —             | 0.2094            | <b>0.0001</b>     |
| Vitronectin | 0.0068        | <b>0.0004</b>     | 0.0048            | 0.0061            | 0.0472            | 0.2094        | —                 | <b>&lt;0.0001</b> |
| BSA         | <b>0.0001</b> | <b>&lt;0.0001</b> | <b>&lt;0.0001</b> | <b>&lt;0.0001</b> | <b>&lt;0.0001</b> | <b>0.0001</b> | <b>&lt;0.0001</b> | —                 |

**C**

**Post-hoc *p*-values ( $\alpha = 0.0018$ ) for ASC binding between ECM groups**

[ANOVA (all groups):  $p < 0.0001$  including BSA control,  $p = 0.2144$  excluding control]

|             | Collagen I    | Collagen II       | Collagen IV       | Fibronectin       | Laminin           | Tenascin      | Vitronectin       | BSA               |
|-------------|---------------|-------------------|-------------------|-------------------|-------------------|---------------|-------------------|-------------------|
| Collagen I  | —             | 0.3372            | 0.1850            | 0.0549            | 0.0714            | 0.2333        | 0.1509            | <b>0.0001</b>     |
| Collagen II | 0.3372        | —                 | 0.5860            | 0.1443            | 0.2194            | 0.6188        | 0.5071            | <b>&lt;0.0001</b> |
| Collagen IV | 0.1850        | 0.5860            | —                 | 0.3318            | 0.5412            | 0.9466        | 0.9438            | <b>&lt;0.0001</b> |
| Fibronectin | 0.0549        | 0.1443            | 0.3318            | —                 | 0.3745            | 0.5198        | 0.2918            | <b>&lt;0.0001</b> |
| Laminin     | 0.0714        | 0.2194            | 0.5412            | 0.3745            | —                 | 0.7326        | 0.5130            | <b>&lt;0.0001</b> |
| Tenascin    | 0.2333        | 0.6188            | 0.9466            | 0.5198            | 0.7326            | —             | 0.9855            | <b>0.0002</b>     |
| Vitronectin | 0.1509        | 0.5071            | 0.9438            | 0.2918            | 0.5130            | 0.9855        | —                 | <b>&lt;0.0001</b> |
| BSA         | <b>0.0001</b> | <b>&lt;0.0001</b> | <b>&lt;0.0001</b> | <b>&lt;0.0001</b> | <b>&lt;0.0001</b> | <b>0.0002</b> | <b>&lt;0.0001</b> | —                 |

\*Statistically significant values after Bonferroni-corrected post-hoc analyses are highlighted in bold.
